# Supplementary material
Source: PubMed Central journal article supplement (PMC3392449)
Supplement: NIHMS380404-supplement-1.pdf [file NIHMS380404-supplement-1.pdf]

## Supplemental Table I. Bla g peptides tested.

| Sequence         | Source protein | UniProt ID | Position |
|------------------|----------------|------------|----------|
| DLLGIPHIPVTARKH  | Bla g 1        | O96522     | 11       |
| LETSPEFKALYDAIR  | Bla g 1        | O96522     | 56       |
| SPEFQSIVGTLEAMP  | Bla g 1        | O96522     | 71       |
| LEAMPEYQNLIQKLK  | Bla g 1        | O96522     | 81       |
| VDHIIELIHQIFNIV  | Bla g 1        | O96522     | 101      |
| ELIHQIFNIVRDTRG  | Bla g 1        | O96522     | 106      |
| IFNIVRDTRGLPEDL  | Bla g 1        | O96522     | 111      |
| LPEDLQDFLALIPTD  | Bla g 1        | O96522     | 121      |
| QDFLALIPTDQVLAI  | Bla g 1        | O96522     | 126      |
| LIPTDQVLAI AADYL | Bla g 1        | O96522     | 131      |
| QVLAI AADYLANDAE | Bla g 1        | O96522     | 136      |
| AADYLANDAEVKA AV | Bla g 1        | O96522     | 141      |
| ANDA EVKAAVEYLKS | Bla g 1        | O96522     | 146      |
| DSLPEFKNFLNFLQT  | Bla g 1        | O96522     | 171      |
| FKNFLNFLQTNGLNA  | Bla g 1        | O96522     | 176      |
| NFLQTNGLNAIEFLN  | Bla g 1        | O96522     | 181      |
| NGLNAIEFLNNIHDL  | Bla g 1        | O96522     | 186      |
| IEFLNNIHDL LGIPH | Bla g 1        | O96522     | 191      |
| TGLIDDIIAILPVDD  | Bla g 1        | O96522     | 221      |
| DI IAILPVDDLYALF | Bla g 1        | O96522     | 226      |
| LPVDDLYALFQEKLE  | Bla g 1        | O96522     | 231      |
| LYALFQEKLETSPEF  | Bla g 1        | O96522     | 236      |
| KALYDAIRSPEFQSI  | Bla g 1        | O96522     | 251      |
| AIRSPEFQSIVETLK  | Bla g 1        | O96522     | 256      |
| EFQSIVETLKAMPEY  | Bla g 1        | O96522     | 261      |
| VETLKAMPEYQSLIQ  | Bla g 1        | O96522     | 266      |
| AMPEYQSLIQKDK    | Bla g 1        | O96522     | 271      |
| QSLIQKDKGVDVD    | Bla g 1        | O96522     | 276      |
| EDLQDFLALIPIDQI  | Bla g 1        | O96522     | 311      |
| FLALIPIDQILAI A  | Bla g 1        | O96522     | 316      |
| PIDQILAI AADYLAN | Bla g 1        | O96522     | 321      |
| DYLANDAEVQA AVEY | Bla g 1        | O96522     | 331      |
| AAVEYLKSDEFETIV  | Bla g 1        | O96522     | 341      |
| LKSDEFETIVTVDS   | Bla g 1        | O96522     | 346      |
| FETIVTVDSLPEFK   | Bla g 1        | O96522     | 351      |
| LNAIEFINNIHDL LG | Bla g 1        | O96522     | 376      |
| FINNIHDL LGIPHIP | Bla g 1        | O96522     | 381      |
| HDLLGIPHIPATGRK  | Bla g 1        | O96522     | 386      |

|                  |              |        |     |
|------------------|--------------|--------|-----|
| VGINGLIDDVAILP   | Bla g 1      | O96522 | 406 |
| LIDDVAILPVDELY   | Bla g 1      | O96522 | 411 |
| IAILPVDELYALFQE  | Bla g 1      | O96522 | 416 |
| VDELYALFQEKLESS  | Bla g 1      | O96522 | 421 |
| ALFQEKLESSPEFKA  | Bla g 1      | O96522 | 426 |
| RSPEFQSIVQTLKAM  | Bla g 1      | O96522 | 446 |
| QSIVQTLKAMPEYQD  | Bla g 1      | O96522 | 451 |
| PEYQDLIQRLKDKGV  | Bla g 1      | O96522 | 461 |
| LIQRLKDKGVDVDHF  | Bla g 1      | O96522 | 466 |
| DHFIELIKKLFGLSH  | Bla g 1      | O96522 | 478 |
| VDVDKIIELIRALFG  | Bla g 1.0101 | Q9UAM5 | 11  |
| IELIRALFGLTLNA   | Bla g 1.0101 | Q9UAM5 | 16  |
| RALFGLTLNAKASRN  | Bla g 1.0101 | Q9UAM5 | 21  |
| LTLNAKASRNQDDL   | Bla g 1.0101 | Q9UAM5 | 26  |
| LQDDLQDFLALIPVD  | Bla g 1.0101 | Q9UAM5 | 36  |
| QDFLALIPVDQIIAI  | Bla g 1.0101 | Q9UAM5 | 41  |
| DEFETIVVALDALPE  | Bla g 1.0101 | Q9UAM5 | 76  |
| IVVALDALPELQNFL  | Bla g 1.0101 | Q9UAM5 | 81  |
| IDFLNGIHDLLGIPH  | Bla g 1.0101 | Q9UAM5 | 106 |
| GIHDLLGIPHIPVSG  | Bla g 1.0101 | Q9UAM5 | 111 |
| RKYHIRRGVVGITGLI | Bla g 1.0101 | Q9UAM5 | 126 |
| DDVLAILPIEDLKAL  | Bla g 1.0101 | Q9UAM5 | 141 |
| ILPIEDLKALFNEKL  | Bla g 1.0101 | Q9UAM5 | 146 |
| ETSPDFLALYNAIRS  | Bla g 1.0101 | Q9UAM5 | 161 |
| FLALYNAIRSPEFQS  | Bla g 1.0101 | Q9UAM5 | 166 |
| PEFQSIVQTLNAMPE  | Bla g 1.0101 | Q9UAM5 | 176 |
| IVQTLNAMPEYQNLL  | Bla g 1.0101 | Q9UAM5 | 181 |
| NAMPEYQNLLQKLRE  | Bla g 1.0101 | Q9UAM5 | 186 |
| YQNLLQKLREKGVVDV | Bla g 1.0101 | Q9UAM5 | 191 |
| LIRALFGLTLNGKAS  | Bla g 1.0101 | Q9UAM5 | 211 |
| FGLTLNGKASRNQD   | Bla g 1.0101 | Q9UAM5 | 216 |
| VDQIIAIATDYLAND  | Bla g 1.0101 | Q9UAM5 | 241 |
| AIATDYLANDAEVQA  | Bla g 1.0101 | Q9UAM5 | 246 |
| AEVQAAVAYLQSDEF  | Bla g 1.0101 | Q9UAM5 | 256 |
| AVAYLQSDEFETIVV  | Bla g 1.0101 | Q9UAM5 | 261 |
| QSDEFETIVVTLDAL  | Bla g 1.0101 | Q9UAM5 | 266 |
| ETIVVTLDALPELQN  | Bla g 1.0101 | Q9UAM5 | 271 |
| PELQNFLNFLEANGL  | Bla g 1.0101 | Q9UAM5 | 281 |
| FLNFLEANGLNAIDF  | Bla g 1.0101 | Q9UAM5 | 286 |
| LNGIHDLLGIPHIPV  | Bla g 1.0101 | Q9UAM5 | 301 |
| DLLGIPHIPVSGRKY  | Bla g 1.0101 | Q9UAM5 | 306 |
| VGITGLIDDVLAILP  | Bla g 1.0101 | Q9UAM5 | 326 |

|                  |              |        |     |
|------------------|--------------|--------|-----|
| LIDDLVAILPLDDLK  | Bla g 1.0101 | Q9UAM5 | 331 |
| LAILPLDDLKALFNE  | Bla g 1.0101 | Q9UAM5 | 336 |
| LDDLKALFNEKLETS  | Bla g 1.0101 | Q9UAM5 | 341 |
| PDFLALYNAIKSPEF  | Bla g 1.0101 | Q9UAM5 | 356 |
| LYNAIKSPEFQSIVQ  | Bla g 1.0101 | Q9UAM5 | 361 |
| MIGLKLVTVLFVAVAT | Bla g 2      | P54958 | 1   |
| LVTVLFVAVATITHAA | Bla g 2      | P54958 | 6   |
| FAVATITHAAELQRV  | Bla g 2      | P54958 | 11  |
| ITHAAELQRVPLYKL  | Bla g 2      | P54958 | 16  |
| ELQRVPLYKLVHVF   | Bla g 2      | P54958 | 21  |
| PLYKLVHVFINTQYA  | Bla g 2      | P54958 | 26  |
| VHVFINTQYAGITKI  | Bla g 2      | P54958 | 31  |
| NTQYAGITKIGNQNF  | Bla g 2      | P54958 | 36  |
| GITKIGNQNFLTVFD  | Bla g 2      | P54958 | 41  |
| GNQNFLTVFDSTSCN  | Bla g 2      | P54958 | 46  |
| PNLQKYEKLKPKYIS  | Bla g 2      | P54958 | 76  |
| YEKLKPKYISDGNVQ  | Bla g 2      | P54958 | 81  |
| PKYISDGNVQVKFFD  | Bla g 2      | P54958 | 86  |
| DGNVQVKFFDGTSAV  | Bla g 2      | P54958 | 91  |
| VKFFDGTSAVGRGIE  | Bla g 2      | P54958 | 96  |
| GRGIEDSLTISNLTT  | Bla g 2      | P54958 | 106 |
| LSQEVCILSADVVG   | Bla g 2      | P54958 | 131 |
| CILSADVVGIAAPG   | Bla g 2      | P54958 | 136 |
| KGKTVLENFVEENLI  | Bla g 2      | P54958 | 156 |
| LENFVEENLIAPVFS  | Bla g 2      | P54958 | 161 |
| EENLIAPVFSIHHAR  | Bla g 2      | P54958 | 166 |
| APVFSIHHARFQDGE  | Bla g 2      | P54958 | 171 |
| IFGGSDWKYVDGEFT  | Bla g 2      | P54958 | 191 |
| DWKYVDGEFTYVPLV  | Bla g 2      | P54958 | 196 |
| DGEFTYVPLVGDSSW  | Bla g 2      | P54958 | 201 |
| YVPLVGDSSWKFRDL  | Bla g 2      | P54958 | 206 |
| GDSSWKFRDLGVKIG  | Bla g 2      | P54958 | 211 |
| PAGTQAIIDTSKAI   | Bla g 2      | P54958 | 231 |
| AIIDTSKAIIVGPKA  | Bla g 2      | P54958 | 236 |
| SKAIIVGPKAYVNPI  | Bla g 2      | P54958 | 241 |
| VGPKAYVNPINEAIG  | Bla g 2      | P54958 | 246 |
| SLPDVTFVINGRNFN  | Bla g 2      | P54958 | 281 |
| TFVINGRNFNISSQY  | Bla g 2      | P54958 | 286 |
| GRNFNISSQYIQQN   | Bla g 2      | P54958 | 291 |
| ISSQYIQQNGNLCY   | Bla g 2      | P54958 | 296 |
| HFFIGDFFVDHYYSE  | Bla g 2      | P54958 | 321 |
| DFFVDHYYSEFNWEN  | Bla g 2      | P54958 | 326 |

|                  |         |        |     |
|------------------|---------|--------|-----|
| LDYERFRGSWIIAAG  | Bla g 4 | P54962 | 26  |
| FRGSWIIAAGTSEAL  | Bla g 4 | P54962 | 31  |
| IIAAGTSEALTQYKC  | Bla g 4 | P54962 | 36  |
| WIDRFSYDDALVSKY  | Bla g 4 | P54962 | 51  |
| YNDKGKAFSAPYSVL  | Bla g 4 | P54962 | 91  |
| KAFSAPYSVLATDYE  | Bla g 4 | P54962 | 96  |
| PYSVLATDYENYAIV  | Bla g 4 | P54962 | 101 |
| ATDYENYAIVEGCPA  | Bla g 4 | P54962 | 106 |
| AANGHVIVVQIRFSV  | Bla g 4 | P54962 | 121 |
| VIYVQIRFSVRRFHP  | Bla g 4 | P54962 | 126 |
| IRFSVRRFHPKLGDK  | Bla g 4 | P54962 | 131 |
| EMIQHYTLDQVNQHK  | Bla g 4 | P54962 | 146 |
| KAIEEDLKHFNLYE   | Bla g 4 | P54962 | 161 |
| KHFNLKYEDLHSTCH  | Bla g 4 | P54962 | 168 |
| KLTYCPVKALGEPPIR | Bla g 5 | O18598 | 6   |
| GEPPIRFLLSYGEKDF | Bla g 5 | O18598 | 16  |
| FLLSYGEKDFEDYRF  | Bla g 5 | O18598 | 21  |
| SMPFGKTPVLEIDGK  | Bla g 5 | O18598 | 46  |
| QTHQSVAISRYLGKQ  | Bla g 5 | O18598 | 61  |
| VAISRYLGKQFGLSG  | Bla g 5 | O18598 | 66  |
| NLEIDMIVDTISDFR  | Bla g 5 | O18598 | 86  |
| MIVDTISDFRAAIAN  | Bla g 5 | O18598 | 91  |
| ISDFRAAIANYHYDA  | Bla g 5 | O18598 | 96  |
| TKKFDEVVKANGGYL  | Bla g 5 | O18598 | 131 |
| EVVKANGGYLAAGKL  | Bla g 5 | O18598 | 136 |
| NGGYLAAGKLTWADF  | Bla g 5 | O18598 | 141 |
| TWADFYFVAILDYLN  | Bla g 5 | O18598 | 151 |
| YFVAILDYLNHMAKE  | Bla g 5 | O18598 | 156 |
| LDYLNHMAKEDLVAN  | Bla g 5 | O18598 | 161 |
| HMAKEDLVANQP NLK | Bla g 5 | O18598 | 166 |
| DLVANQP NLKALREK | Bla g 5 | O18598 | 171 |
| QP NLKALREKVLGLP | Bla g 5 | O18598 | 176 |
| ALREKVLGLPAIKAW  | Bla g 5 | O18598 | 181 |
| VLGLPAIKAWVAKRP  | Bla g 5 | O18598 | 186 |
| EQISVLRKAFDAFDR  | Bla g 6 | Q1A7B1 | 11  |
| LRKAFDAFDREKSGS  | Bla g 6 | Q1A7B1 | 16  |
| VEEILRLMGQPFNRR  | Bla g 6 | Q1A7B1 | 36  |
| ADKSGRLEFDEFVTL  | Bla g 6 | Q1A7B1 | 61  |
| RLEFDEFVTLAAKFI  | Bla g 6 | Q1A7B1 | 66  |
| EFVTLAAKFIIEEDS  | Bla g 6 | Q1A7B1 | 71  |
| EAMEKELREAFRLYD  | Bla g 6 | Q1A7B1 | 86  |
| CLREILRELDEQLTS  | Bla g 6 | Q1A7B1 | 111 |

|                  |              |        |     |
|------------------|--------------|--------|-----|
| DELDMMIEEIDADGS  | Bla g 6      | Q1A7B1 | 126 |
| SGTVDFDEFMEMMTG  | Bla g 6      | Q1A7B1 | 140 |
| AEQVLLKKAFDAFD   | Bla g 6.0101 | Q1A7B2 | 6   |
| MVGTILEMLGTRLDQ  | Bla g 6.0101 | Q1A7B2 | 31  |
| GELEFEEFCTLASRF  | Bla g 6.0101 | Q1A7B2 | 61  |
| EEFCTLASRFLVEED  | Bla g 6.0101 | Q1A7B2 | 66  |
| HELREAFRLYDKEGN  | Bla g 6.0101 | Q1A7B2 | 86  |
| DKEGNGYITTAVLRE  | Bla g 6.0101 | Q1A7B2 | 96  |
| GYITTAVLREILKEL  | Bla g 6.0101 | Q1A7B2 | 101 |
| AVLREILKELDDKIT  | Bla g 6.0101 | Q1A7B2 | 106 |
| PEQIQLLKKAFDAFD  | Bla g 6.0201 | Q1A7B3 | 6   |
| MVGTILEMLGHRLDD  | Bla g 6.0201 | Q1A7B3 | 31  |
| DMLQEIIAEVDADGS  | Bla g 6.0201 | Q1A7B3 | 46  |
| GELEFEEFVSLASRF  | Bla g 6.0201 | Q1A7B3 | 61  |
| EEFVSLASRFLVEED  | Bla g 6.0201 | Q1A7B3 | 66  |
| GYITTNVLREILKEL  | Bla g 6.0201 | Q1A7B3 | 101 |
| MDAIKKKMQAMKLEK  | Bla g 7      | Q9NG56 | 1   |
| KKMQAMKLEKDNAMD  | Bla g 7      | Q9NG56 | 6   |
| LQKKIQQIENDLDQT  | Bla g 7      | Q9NG56 | 46  |
| MEQLMQVNAKLDEKD  | Bla g 7      | Q9NG56 | 61  |
| KALQNAESEVAALNR  | Bla g 7      | Q9NG56 | 76  |
| AESEVAALNRRIQLL  | Bla g 7      | Q9NG56 | 81  |
| AALNRRIQLLEEDLE  | Bla g 7      | Q9NG56 | 86  |
| RSEERLATATAKLAE  | Bla g 7      | Q9NG56 | 101 |
| LATATAKLAEASQAA  | Bla g 7      | Q9NG56 | 106 |
| GESKIVELEEEELRVV | Bla g 7      | Q9NG56 | 186 |
| VELEEELRVVGNLKL  | Bla g 7      | Q9NG56 | 191 |
| ELRVVGNLKLKSLEVS | Bla g 7      | Q9NG56 | 196 |
| LREEEYKQIQIKTLNT | Bla g 7      | Q9NG56 | 216 |
| YKQIQIKTLNTRLKEA | Bla g 7      | Q9NG56 | 221 |
| ICDDLDMTFTELIGN  | Bla g 7      | Q9NG56 | 270 |

**Supplemental Table II. Complete list of peptide reactivities detected.**

| Antigen | Position | Region ID | Sequence         | Donor  | IFN $\gamma$<br>(SFC) | IL-5<br>(SFC) | Total<br>(SFC) |
|---------|----------|-----------|------------------|--------|-----------------------|---------------|----------------|
| Bla g 1 | 351      | 1         | FETIVVTVDSLPEFK  | XT0005 | 167                   | 0             | 167            |
|         | 40       | 3         | PEFQSIVQTLNAMPE  | XT0031 | 87                    | 0             | 87             |
|         | 181      |           | IVQTLNAMPEYQNLL  | XT0003 | 153                   | 87            | 240            |
|         | 281      | 4         | PELQNFLNFLEANGL  | XT0034 | 323                   | 0             | 323            |
|         | 331      | 2         | LIDDVLAAILPLDDLK | XT0003 | 160                   | 997           | 1157           |
| Bla g 2 | 11       | 5         | FAVATITHAAELQRV  | U00023 | 855                   | 0             | 855            |
|         | 26       | 6         | PLYKLVHVFINTQYA  | XT0031 | 240                   | 0             | 240            |
|         | 46       | 7         | GNQNFLT VFDSTSCN | U00023 | 55                    | 0             | 55             |
|         | 296      | 8         | ISSQYYIQQGNLCY   | XT0038 | 153                   | 0             | 153            |
|         | 321      | 9         | HFFIGDFFVDHYyse  | XT0031 | 250                   | 0             | 250            |
| Bla g 5 | 16       | 10        | GEPIRFLLSYGEKDF  | XT0041 | 205                   | 0             | 205            |
|         | 21       |           | FLLSYGEKDFEDYRF  | XT0011 | 0                     | 1537          | 1537           |
|         |          |           |                  | XT0021 | 77                    | 0             | 77             |
|         |          |           |                  | XT0023 | 0                     | 203           | 203            |
|         |          |           |                  | XT0030 | 127                   | 193           | 320            |
|         | 46       | 11        | SMPFGKTPVLEIDGK  | XT0021 | 57                    | 0             | 57             |
|         |          |           |                  | XT0041 | 250                   | 567           | 817            |
|         | 66       | 12        | VAISRYLGKQFGLSG  | XT0023 | 287                   | 1573          | 1860           |
|         |          |           |                  | XT0030 | 153                   | 430           | 583            |
|         | 96       | 13        | ISDFRAAIANYHYDA  | XT0024 | 263                   | 1760          | 2023           |
|         |          |           |                  | XT0025 | 0                     | 80            | 80             |
|         | 136      | 14        | EVVKANGGYLAAGKL  | XT0023 | 80                    | 467           | 547            |
|         |          |           |                  | XT0034 | 380                   | 0             | 380            |
|         | 156      | 15        | YFVAILDYLNHMAKE  | XT0024 | 0                     | 213           | 213            |
|         |          |           |                  | XT0041 | 1043                  | 473           | 1517           |
|         | 166      | 16        | HMAKEDLVANQP NLK | XT0029 | 610                   | 273           | 883            |
|         | 171      |           | DLVANQP NLKALREK | XT0013 | 177                   | 0             | 177            |
|         |          |           |                  | XT0021 | 80                    | 0             | 80             |
|         | 181      | 17        | ALREKVLGLPAIKAW  | XT0013 | 843                   | 0             | 843            |
|         |          |           |                  | XT0021 | 100                   | 0             | 100            |
|         |          |           | XT0023           | 0      | 267                   | 267           |                |
|         |          |           | XT0025           | 183    | 380                   | 563           |                |
|         |          |           | XT0029           | 147    | 0                     | 147           |                |
|         |          |           | XT0034           | 1690   | 1087                  | 2777          |                |
|         | 186      |           | VLGLPAIKAWVAKRP  | XT0012 | 50                    | 0             | 50             |
|         |          |           |                  | XT0041 | 73                    | 133           | 207            |
| Bla g 6 | 11       | 18        | EQISVLRKAFDAFDR  | XT0024 | 0                     | 340           | 340            |
|         | 16       |           | LRKAFDAFDREKSGS  | XT0022 | 90                    | 327           | 417            |

|     |    |                  |        |     |      |      |
|-----|----|------------------|--------|-----|------|------|
| 71  | 19 | EFVTLAAKFIIIEEDS | XT0024 | 0   | 443  | 443  |
| 86  | 21 | EAMEKELREAFRLYD  | XT0024 | 0   | 53   | 53   |
| 140 | 22 | SGTVDFDEFMEMMTG  | XT0024 | 0   | 57   | 57   |
| 31  | 24 | MVGTILEMLGTRLDQ  | XT0024 | 0   | 267  | 267  |
| 66  | 20 | EEFCTLASRFLVEED  | XT0024 | 0   | 1213 | 1213 |
| 6   | 23 | PEQIQLLKKAFDAFD  | U00023 | 0   | 1172 | 1172 |
|     |    |                  | XT0024 | 0   | 73   | 73   |
| 31  | 24 | MVGTILEMLGHRLDD  | XT0008 | 0   | 50   | 50   |
| 66  | 20 | EEFVSLASRFLVEED  | XT0015 | 220 | 0    | 220  |
| 101 | 25 | GYITTNVLRILKEL   | XT0008 | 0   | 50   | 50   |

---

**Supplemental Table III. Average fraction of the sequences, and the corresponding fraction of unique 15-mers, covered by the bioinformatic predictions**

| Antigen      | Protein                   | Acc. no. | Len  | Peptides <sup>1</sup> | Peptides synthesized | Percent          |             |                     |
|--------------|---------------------------|----------|------|-----------------------|----------------------|------------------|-------------|---------------------|
|              |                           |          |      |                       |                      | peptide coverage | AA coverage | Percent AA coverage |
| Bla g 1      |                           | O96522   | 492  | 97                    | 48                   | 49.5             | 363         | 73.8                |
| Bla g 1.0101 |                           | Q9UAM5   | 412  | 81                    | 37                   | 45.7             | 280         | 68.0                |
| Bla g 2      | Aspartic protease         | P54958   | 352  | 69                    | 37                   | 53.6             | 270         | 76.7                |
| Bla g 4      | Calycin                   | P54962   | 182  | 35                    | 14                   | 40.0             | 132         | 72.5                |
| Bla g 5      | Glutathione S-transferase | O18598   | 204  | 39                    | 20                   | 51.3             | 160         | 78.4                |
| Bla g 6      | Troponin C                | Q1A7B1   | 154  | 29                    | 10                   | 34.5             | 119         | 77.3                |
| Bla g 6.0101 | Troponin C                | Q1A7B2   | 151  | 29                    | 8                    | 27.6             | 85          | 56.3                |
| Bla g 6.0201 | Troponin C                | Q1A7B3   | 151  | 29                    | 6                    | 20.7             | 80          | 53.0                |
| Bla g 7      | Tropomyosin               | Q9NG56   | 284  | 55                    | 15                   | 27.3             | 155         | 54.6                |
| Total        |                           |          | 2382 | 463                   | 195                  | 42.1             | 1644        | 69.0                |

1. Refers to the number of unique 15-mers, considering a 10 residue overlap, spanning the entire sequence.



**Supplemental Table IV. IgE and T cell responsiveness of individual donors to each cockroach allergen.**

| Donor  | Blag 1 |        | Blag 2 |        | Blag 4 |        | Blag 5 |        | Per a 7 |        |
|--------|--------|--------|--------|--------|--------|--------|--------|--------|---------|--------|
|        | RAST   | T cell | RAST    | T cell |
| U00023 | -      | -      | -      | -      | -      | -      | -      | -      | -       | +      |
| U00029 | -      | -      | -      | -      | -      | -      | -      | -      | -       | -      |
| U00038 | -      | -      | -      | -      | -      | -      | -      | -      | -       | -      |
| U00107 | -      | -      | -      | -      | -      | -      | -      | -      | -       | -      |
| XT0001 | -      | -      | -      | -      | -      | -      | 1.89   | -      | -       | -      |
| XT0002 | -      | -      | -      | -      | -      | -      | -      | -      | -       | -      |
| XT0003 | -      | +      | 1.39   | -      | -      | -      | 0.51   | -      | -       | -      |
| XT0004 | -      | -      | -      | -      | -      | -      | -      | -      | -       | -      |
| XT0005 | -      | +      | -      | -      | -      | -      | -      | -      | -       | -      |
| XT0007 | -      | -      | -      | -      | -      | -      | -      | -      | -       | -      |
| XT0008 | -      | -      | 1.13   | -      | -      | -      | 0.76   | -      | -       | +      |
| XT0009 | -      | -      | 12.5   | -      | -      | -      | 36.7   | -      | 125     | -      |
| XT0010 | 0.35   | -      | -      | -      | -      | -      | -      | -      | -       | -      |
| XT0011 | -      | -      | -      | -      | -      | -      | 0.63   | +      | -       | -      |
| XT0012 | -      | -      | -      | -      | -      | -      | -      | +      | -       | -      |
| XT0013 | -      | -      | 1.6    | -      | -      | -      | 8.91   | +      | -       | -      |
| XT0015 | -      | -      | -      | -      | -      | -      | -      | -      | -       | +      |
| XT0018 | -      | -      | -      | -      | -      | -      | -      | -      | -       | -      |
| XT0019 | -      | -      | -      | -      | -      | -      | -      | -      | -       | -      |
| XT0020 | -      | -      | -      | -      | 1.63   | -      | 2.31   | -      | -       | -      |
| XT0021 | -      | -      | -      | -      | -      | -      | -      | +      | -       | -      |
| XT0022 | -      | -      | -      | -      | -      | -      | -      | -      | -       | +      |
| XT0023 | -      | -      | 1.55   | +      | 12.1   | -      | 16.4   | +      | -       | -      |
| XT0024 | -      | -      | -      | -      | -      | -      | -      | +      | -       | +      |
| XT0025 | -      | -      | -      | -      | -      | -      | -      | +      | -       | -      |
| XT0027 | -      | -      | -      | -      | -      | -      | -      | -      | -       | -      |
| XT0029 | 29.6   | -      | 9.03   | -      | 23     | -      | 94.5   | +      | 69.6    | -      |
| XT0030 | -      | -      | 2.92   | -      | -      | -      | 3.01   | +      | 2.32    | -      |
| XT0031 | 0.85   | +      | -      | +      | -      | -      | -      | -      | -       | -      |
| XT0032 | -      | -      | -      | -      | -      | -      | 11.6   | -      | -       | -      |
| XT0034 | -      | +      | -      | -      | -      | -      | 10.1   | +      | -       | -      |
| XT0037 | 0.44   | -      | -      | -      | 1.08   | -      | 1.21   | -      | -       | -      |
| XT0038 | -      | -      | -      | +      | -      | -      | 2.88   | -      | 3.47    | -      |
| XT0041 | -      | -      | 2.26   | -      | -      | -      | 3.67   | +      | -       | -      |
